# Supplementary material
Source: ML conference proceedings conference paper supplement (https://proceedings.mlr.press/v139/zanella-beguelin21a.html)
Supplement: Supplementary file [file zanella-beguelin21a-supp.pdf]

## A Details of Models

Most of the models we targeted in attacks come from Hugging Face Model Hub (<https://huggingface.co/models>). Since no BERT-small model was available, we imported the corresponding publically-available TensorFlow model. When a fine-tuned model for an architecture/task combination was not available, we trained one ourselves using standard parameters using a version of the `run_glue.py` script from HuggingFace Transformers library extended to train models on AG News. Concretely, we fine-tuned the pre-trained model for 3 epochs using an initial learning rate of  $2 \times 10^{-5}$  using AdamW with a linear learning rate scheduler. We used a batch size of 8 for RoBERTa-base and BART-large and 32 for the rest.

| Architecture (params) | Pre-trained model       | Fine-tuned model                     | Accuracy |
|-----------------------|-------------------------|--------------------------------------|----------|
| BERT-small (15M)      | From TensorFlow         | Own trained                          | 0.875    |
| BERT-base (110M)      | bert-base-uncased       | textattack/bert-base-uncased-SST-2   | 0.924    |
| RoBERTa-base (125M)   | roberta-base            | textattack/roberta-base-SST-2        | 0.940    |
| ALBERT-base-v2 (11M)  | albert-base-v2          | textattack/albert-base-v2-SST-2      | 0.925    |
| XLNet-base (110M)     | xlnet-base-cased        | textattack/xlnet-base-cased-SST-2    | 0.944    |
| DistilBERT (66M)      | distilbert-base-uncased | Own trained                          | 0.909    |
| BART-large (406M)     | facebook/bart-large     | textattack/facebook-bart-large-SST-2 | 0.953    |

Table 1: Details of target models for SST-2 task. Named models were obtained from Hugging Face Model Hub.

| Architecture (params) | Pre-trained model       | Fine-tuned model                    | Accuracy |
|-----------------------|-------------------------|-------------------------------------|----------|
| BERT-small (15M)      | From TensorFlow         | Own trained                         | 0.777    |
| BERT-base (110M)      | bert-base-uncased       | textattack/bert-base-uncased-SST-2  | 0.846    |
| RoBERTa-base (125M)   | roberta-base            | textattack/roberta-base-MNLI        | 0.881    |
| ALBERT-base-v2 (11M)  | albert-base-v2          | Own trained                         | 0.849    |
| XLNet-base (110M)     | xlnet-base-cased        | textattack/xlnet-base-cased-MNLI    | 0.871    |
| DistilBERT (66M)      | distilbert-base-uncased | Own trained                         | 0.812    |
| BART-large (406M)     | facebook/bart-large     | textattack/facebook-bart-large-MNLI | 0.889    |

Table 2: Details of target models for MNLI task. Named models were obtained from Hugging Face Model Hub.

| Architecture (params) | Pre-trained model       | Fine-tuned model                           | Accuracy |
|-----------------------|-------------------------|--------------------------------------------|----------|
| BERT-small (15M)      | From TensorFlow         | Own trained                                | 0.939    |
| BERT-base (110M)      | bert-base-uncased       | textattack/bert-base-uncased-ag-news       | 0.955    |
| RoBERTa-base (125M)   | roberta-base            | textattack/roberta-base-ag-news            | 0.948    |
| ALBERT-base-v2 (11M)  | albert-base-v2          | textattack/albert-base-v2-ag-news          | 0.948    |
| XLNet-base (110M)     | xlnet-base-cased        | Own trained                                | 0.951    |
| DistilBERT (66M)      | distilbert-base-uncased | textattack/distilbert-base-uncased-ag-news | 0.951    |
| BART-large (406M)     | facebook/bart-large     | Own trained                                | 0.952    |

Table 3: Details of target models for AG News task. Named models were obtained from Hugging Face Model Hub.

## B Results with BERT-Small

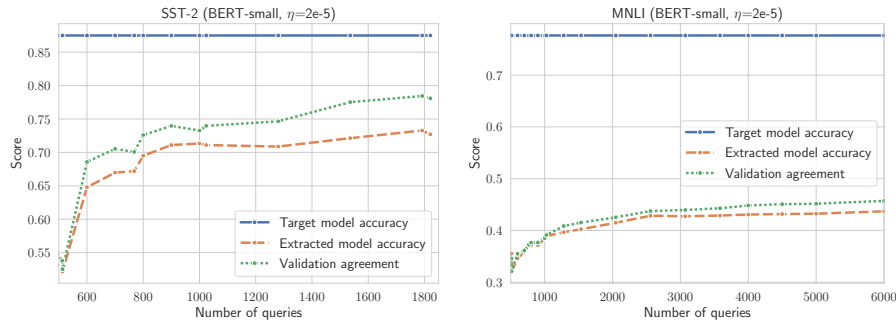

Figure 1: Effect of number of inputs on extracted model task accuracy and agreement of extracted model. Baseline accuracy with a random guess is 50% for SST-2 and 33% for MNLI.

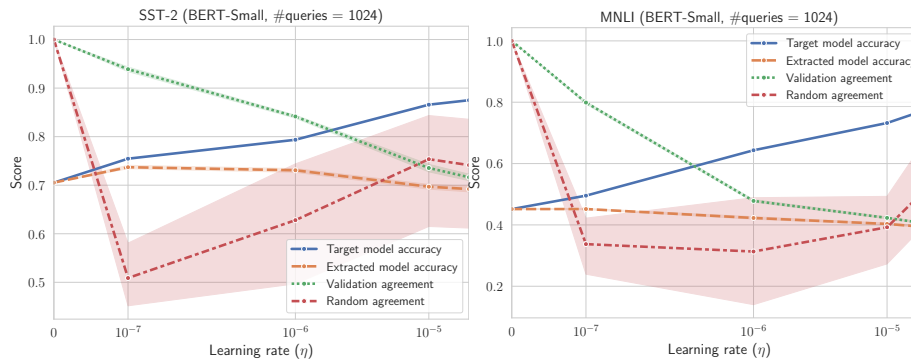

Figure 2: Effect of learning rate on original model task accuracy, extracted model task accuracy, and fidelity of extracted model.

## C Full Experimental Results Varying Learning Rate

Effect of learning rate on task accuracy of extracted models, and agreement with target model on in-distribution (Fig. 3) and random (Fig. 4) queries.

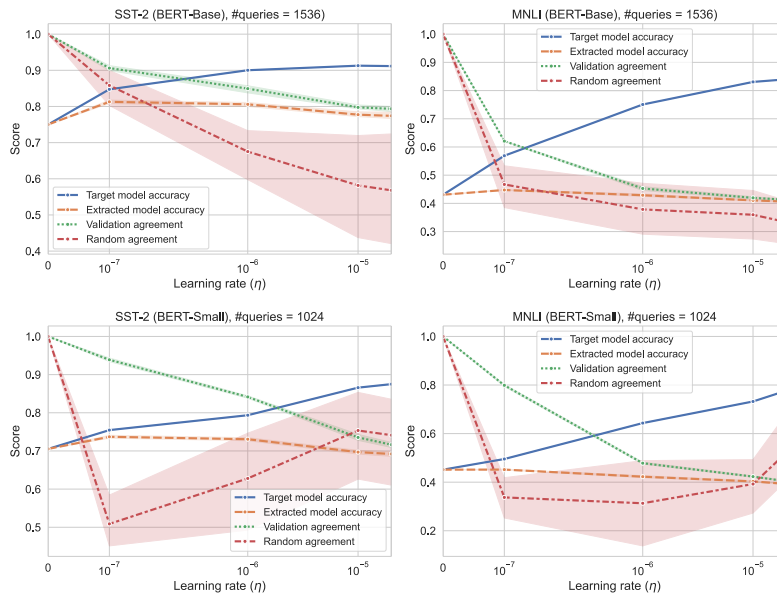

Figure 3: Extraction with in-distribution queries

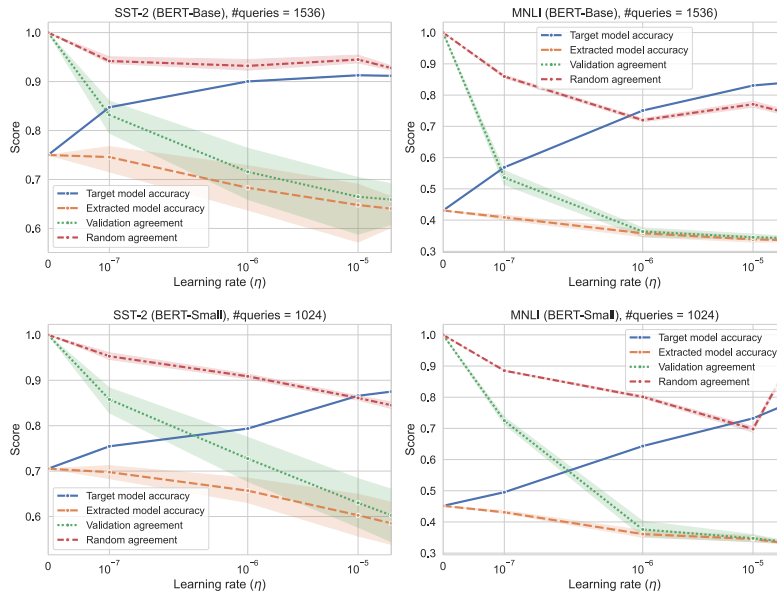

Figure 4: Extraction with random queries

## D Full Experimental Results Varying Number of Queries

### D.1 BERT-Base and SST-2

Effect of number of queries on task accuracy of extracted model and agreement with target model, for in-distribution (Fig. 5) and random (Fig. 6) queries. Baseline accuracy of random guess: 50%.

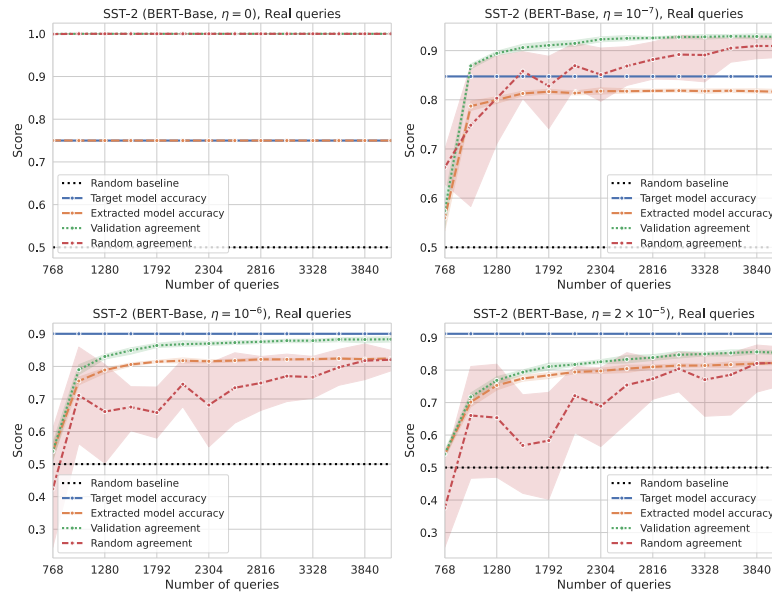

Figure 5: Extraction with in-distribution queries

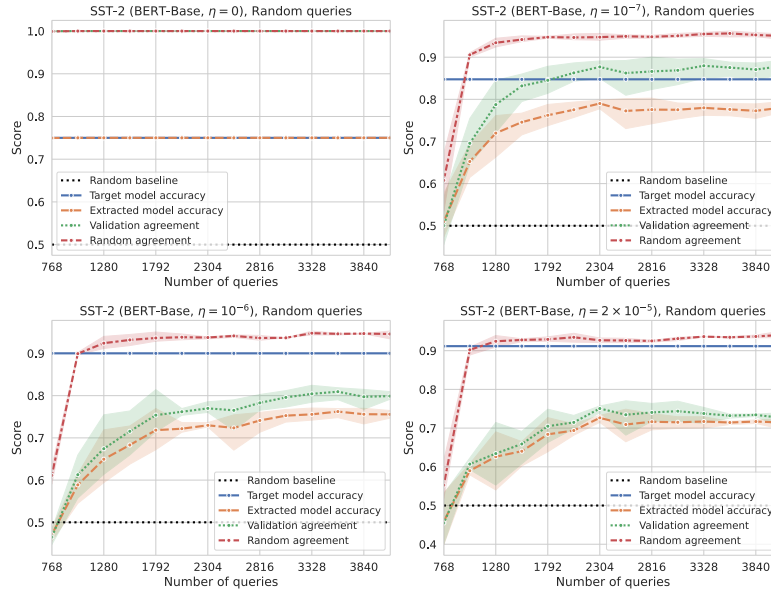

Figure 6: Extraction with random queries

## D.2 BERT-Base and MNLI

Effect of number of queries on task accuracy of extracted model and agreement with target model, for in-distribution (Fig. 7) and random (Fig. 8) queries. Baseline accuracy of random guess: 33%.

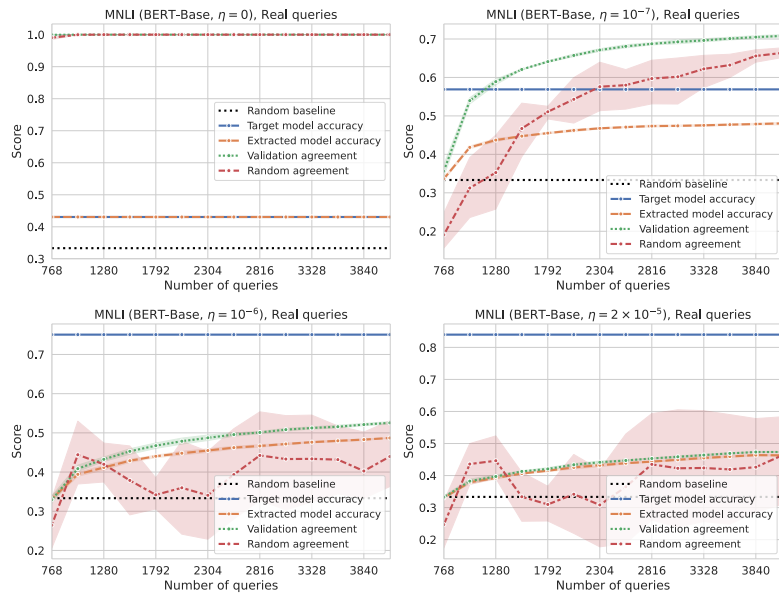

Figure 7: Extraction with in-distribution queries

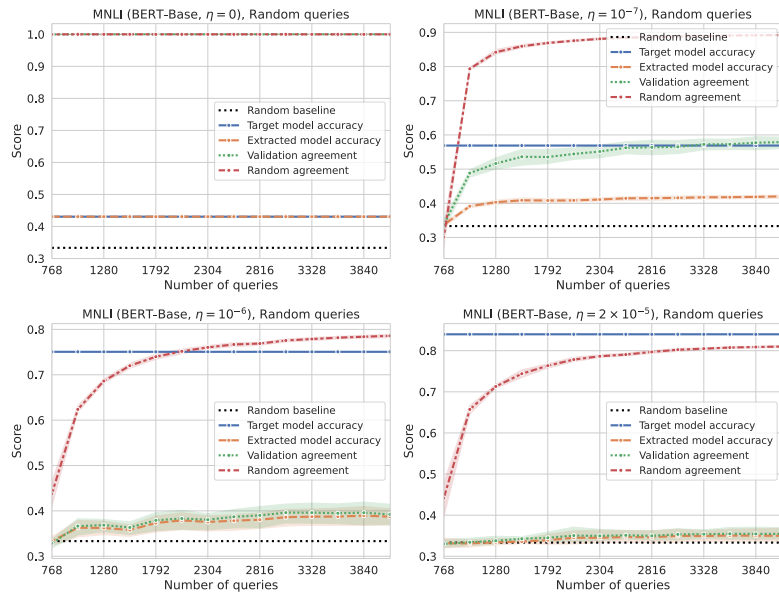

Figure 8: Extraction with random queries

### D.3 BERT-Small and SST-2

Effect of number of queries on task accuracy of extracted model and agreement with target model, for in-distribution (Fig. 9) and random (Fig. 10) queries. Baseline accuracy of random guess: 50%.

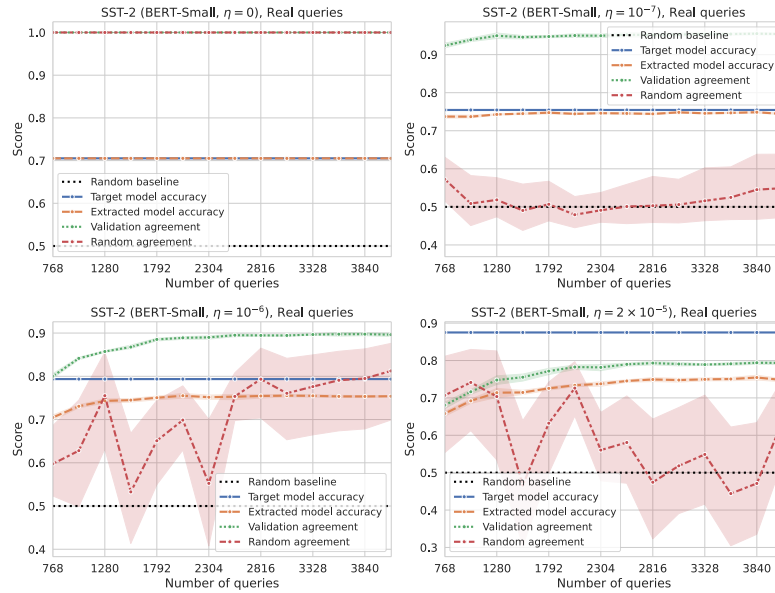

Figure 9: Extraction with in-distribution queries

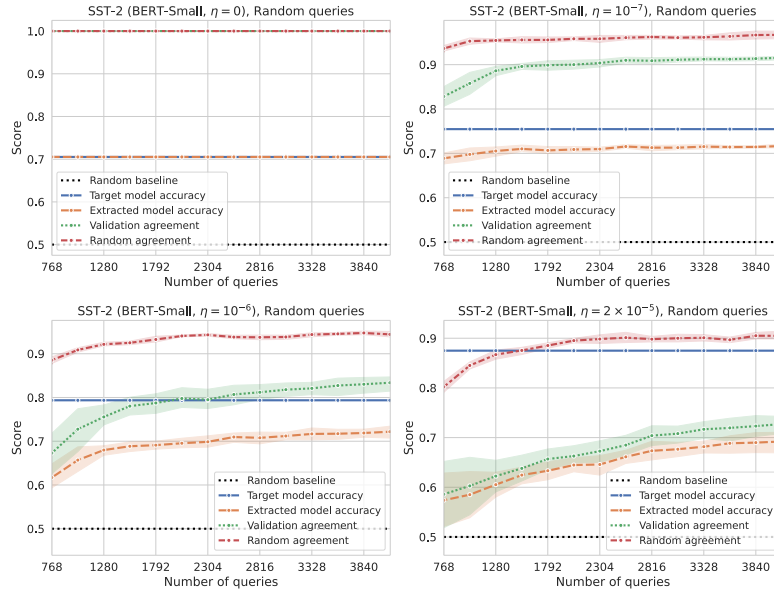

Figure 10: Extraction with random queries

#### D.4 BERT-Small and MNLI

Effect of number of queries on task accuracy of extracted model and agreement with target model, for in-distribution (Fig. 11) and random (Fig. 12) queries. Baseline accuracy of random guess: 33%.



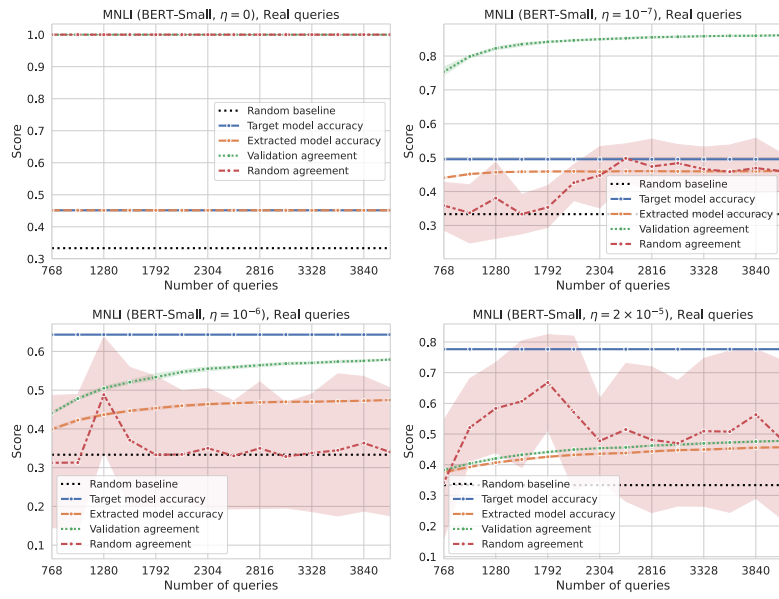

Figure 11: Extraction with in-distribution queries

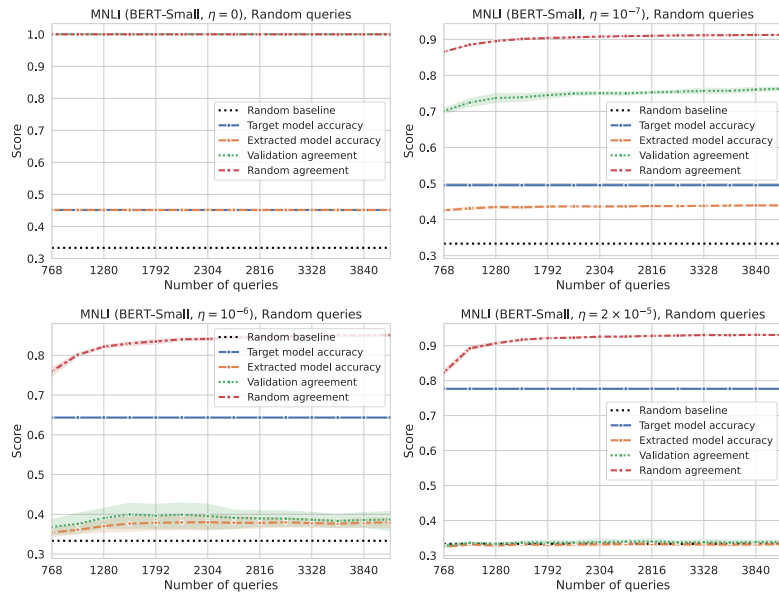

Figure 12: Extraction with random queries
